# Supplementary material for: Ambient air pollution and emergency department visits and hospitalisation for cardiac arrest: a population-based case–crossover study in Reykjavik, Iceland
Source: HighWire-hosted journal article supplement (doi:10.1136/bmjopen-2022-066743), 2023-05-01
Supplement: bmjopen-2022-066743supp001_data_supplement.pdf [file bmjopen-2022-066743supp001_data_supplement.pdf]

**Table A** Number of visits (n), odds ratios (OR) and 95% confidence intervals (CI) for the daily emergency hospital visits for cardiac arrest (ICD-10 code: I46) in Reykjavik capital area associated with 10 µg/m<sup>3</sup> increase in NO<sub>2</sub>, PM<sub>10</sub>, PM<sub>2.5</sub>, SO<sub>2</sub>, and H<sub>2</sub>S, in single pollutant models, unstratified and stratified by gender, age, and season, at lag 0 to lag 4, lag 0-1, and lag 0-2.

| Categories/Visits (n) | Lag | NO <sub>2</sub> |             | PM <sub>10</sub> |             | PM <sub>2.5</sub> |             | SO <sub>2</sub> |              | H <sub>2</sub> S |             |
|-----------------------|-----|-----------------|-------------|------------------|-------------|-------------------|-------------|-----------------|--------------|------------------|-------------|
|                       |     | OR              | 95% CI      | OR               | 95% CI      | OR                | 95% CI      | OR              | 95% CI       | OR               | 95% CI      |
| All (453)             | 0   | 1.028           | 0.948-1.115 | 1.020            | 0.961-1.081 | 0.994             | 0.934-1.058 | 1.085           | 1.003-1.173  | 1.199            | 0.990-1.451 |
|                       | 1   | 1.012           | 0.933-1.098 | 1.037            | 0.985-1.091 | 0.993             | 0.936-1.054 | 0.985           | 0.876-1.107  | 1.044            | 0.827-1.317 |
|                       | 2   | 0.986           | 0.907-1.071 | 1.077            | 1.020-1.137 | 0.997             | 0.940-1.058 | 1.005           | 0.941-1.073  | 1.047            | 0.848-1.294 |
|                       | 3   | 1.062           | 0.981-1.151 | 1.032            | 0.984-1.081 | 1.024             | 0.970-1.081 | 1.001           | 0.925-1.082  | 1.195            | 0.993-1.439 |
|                       | 4   | 1.081           | 1.002-1.166 | 1.036            | 0.974-1.103 | 1.051             | 0.989-1.116 | 1.007           | 0.947-1.072  | 0.969            | 0.764-1.228 |
|                       | 0-1 | 1.030           | 0.933-1.137 | 1.045            | 0.977-1.116 | 0.992             | 0.926-1.062 | 1.082           | 0.970-1.207  | 1.207            | 0.934-1.560 |
|                       | 0-2 | 1.017           | 0.908-1.139 | 1.097            | 1.016-1.184 | 0.992             | 0.921-1.069 | 1.076           | 0.950-1.219  | 1.228            | 0.907-1.663 |
| Females (125)         | 0   | 1.215           | 1.033-1.429 | 1.002            | 0.891-1.126 | 0.906             | 0.765-1.073 | 0.683           | 0.166-2.800  | 1.341            | 0.874-2.058 |
|                       | 1   | 1.052           | 0.902-1.228 | 1.028            | 0.953-1.109 | 0.905             | 0.772-1.060 | 0.782           | 0.276-2.211  | 1.052            | 0.719-1.540 |
|                       | 2   | 1.002           | 0.858-1.171 | 1.175            | 1.058-1.304 | 0.972             | 0.856-1.104 | 0.292           | 0.066-1.287  | 0.769            | 0.470-1.260 |
|                       | 3   | 1.042           | 0.893-1.215 | 1.042            | 0.963-1.128 | 0.992             | 0.867-1.134 | 0.387           | 0.105-1.431  | 1.094            | 0.733-1.631 |
|                       | 4   | 1.153           | 1.002-1.327 | 0.955            | 0.843-1.081 | 1.027             | 0.901-1.171 | 0.689           | 0.254-1.870  | 1.072            | 0.695-1.653 |
|                       | 0-1 | 1.222           | 0.993-1.503 | 1.033            | 0.921-1.160 | 0.875             | 0.726-1.056 | 0.655           | 0.158-2.710  | 1.243            | 0.774-1.996 |
|                       | 0-2 | 1.175           | 0.937-1.474 | 1.130            | 0.990-1.289 | 0.898             | 0.748-1.078 | 0.375           | 0.073-1.923  | 1.064            | 0.603-1.880 |
| Males (328)           | 0   | 0.974           | 0.886-1.071 | 1.026            | 0.958-1.098 | 1.015             | 0.949-1.086 | 1.086           | 1.004-1.176  | 1.167            | 0.943-1.444 |
|                       | 1   | 0.997           | 0.906-1.098 | 1.044            | 0.975-1.118 | 1.013             | 0.951-1.079 | 0.988           | 0.879-1.110  | 1.039            | 0.775-1.393 |
|                       | 2   | 0.979           | 0.887-1.081 | 1.043            | 0.981-1.108 | 1.005             | 0.940-1.074 | 1.008           | 0.945-1.075  | 1.144            | 0.902-1.450 |
|                       | 3   | 1.070           | 0.975-1.175 | 1.026            | 0.967-1.088 | 1.031             | 0.972-1.093 | 1.005           | 0.931-1.084  | 1.226            | 0.991-1.516 |
|                       | 4   | 1.053           | 0.962-1.152 | 1.075            | 0.998-1.157 | 1.057             | 0.988-1.132 | 1.009           | 0.949-1.073  | 0.930            | 0.700-1.236 |
|                       | 0-1 | 0.979           | 0.873-1.098 | 1.050            | 0.968-1.140 | 1.017             | 0.946-1.094 | 1.085           | 0.972-1.212  | 1.192            | 0.878-1.618 |
|                       | 0-2 | 0.969           | 0.849-1.106 | 1.080            | 0.983-1.188 | 1.016             | 0.937-1.102 | 1.084           | 0.955-1.230  | 1.304            | 0.910-1.867 |
| Older ≥71 (192)       | 0   | 1.063           | 0.938-1.204 | 0.988            | 0.898-1.087 | 1.039             | 0.941-1.148 | 1.091           | 0.970-1.228  | 1.162            | 0.880-1.534 |
|                       | 1   | 1.005           | 0.884-1.142 | 0.997            | 0.894-1.113 | 1.000             | 0.910-1.100 | 0.973           | 0.834-1.135  | 1.078            | 0.784-1.483 |
|                       | 2   | 1.094           | 0.963-1.241 | 1.149            | 1.043-1.266 | 1.026             | 0.939-1.121 | 1.009           | 0.924-1.103  | 1.153            | 0.870-1.528 |
|                       | 3   | 1.042           | 0.919-1.182 | 1.044            | 0.973-1.120 | 1.026             | 0.928-1.135 | 0.886           | 0.621-1.264  | 1.263            | 0.974-1.638 |
|                       | 4   | 1.048           | 0.934-1.175 | 1.053            | 0.971-1.143 | 1.020             | 0.935-1.112 | 0.999           | 0.898-1.112  | 0.898            | 0.634-1.271 |
|                       | 0-1 | 1.047           | 0.902-1.216 | 0.988            | 0.870-1.121 | 1.024             | 0.917-1.142 | 1.062           | 0.918-1.229  | 1.190            | 0.829-1.707 |
|                       | 0-2 | 1.100           | 0.927-1.306 | 1.111            | 0.979-1.261 | 1.032             | 0.920-1.158 | 1.060           | 0.904-1.244  | 1.293            | 0.853-1.959 |
| Younger <71 (261)     | 0   | 1.005           | 0.903-1.117 | 1.041            | 0.966-1.121 | 0.969             | 0.893-1.051 | 1.079           | 0.973-1.198  | 1.234            | 0.948-1.605 |
|                       | 1   | 1.018           | 0.915-1.131 | 1.049            | 0.989-1.112 | 0.989             | 0.916-1.067 | 1.002           | 0.841-1.196  | 1.007            | 0.718-1.414 |
|                       | 2   | 0.911           | 0.814-1.021 | 1.033            | 0.959-1.112 | 0.976             | 0.900-1.059 | 1.000           | 0.906-1.103  | 0.932            | 0.674-1.289 |
|                       | 3   | 1.077           | 0.971-1.194 | 1.022            | 0.958-1.089 | 1.023             | 0.960-1.091 | 1.072           | 0.943-1.219  | 1.120            | 0.847-1.481 |
|                       | 4   | 1.108           | 1.002-1.226 | 1.014            | 0.921-1.117 | 1.085             | 0.995-1.183 | 1.012           | 0.938-1.092  | 1.042            | 0.751-1.447 |
|                       | 0-1 | 1.017           | 0.892-1.160 | 1.068            | 0.988-1.155 | 0.974             | 0.892-1.063 | 1.106           | 0.939-1.302  | 1.225            | 0.849-1.766 |
|                       | 0-2 | 0.958           | 0.824-1.115 | 1.089            | 0.988-1.199 | 0.967             | 0.878-1.066 | 1.100           | 0.901-1.344  | 1.161            | 0.746-1.806 |
| Older females (57)    | 0   | 1.312           | 1.025-1.678 | 0.973            | 0.811-1.167 | 0.740             | 0.494-1.110 | 0.980           | 0.126-7.599  | 0.987            | 0.523-1.863 |
|                       | 1   | 0.963           | 0.749-1.238 | 1.073            | 0.907-1.270 | 0.934             | 0.775-1.126 | 0.599           | 0.073-4.883  | 1.054            | 0.632-1.757 |
|                       | 2   | 1.126           | 0.887-1.429 | 1.195            | 1.039-1.375 | 0.999             | 0.858-1.162 | 0.149           | 0.010-2.192  | 0.453            | 0.181-1.136 |
|                       | 3   | 1.013           | 0.810-1.267 | 1.042            | 0.949-1.143 | 0.968             | 0.780-1.202 | 0.777           | 0.151-4.010  | 1.071            | 0.651-1.759 |
|                       | 4   | 1.157           | 0.960-1.394 | 0.975            | 0.842-1.128 | 0.937             | 0.765-1.148 | 4.023           | 0.561-28.834 | 0.871            | 0.449-1.688 |
|                       | 0-1 | 1.211           | 0.890-1.648 | 1.036            | 0.833-1.288 | 0.852             | 0.636-1.141 | 0.701           | 0.064-7.649  | 1.035            | 0.539-1.989 |
|                       | 0-2 | 1.256           | 0.898-1.755 | 1.178            | 0.956-1.451 | 0.919             | 0.722-1.171 | 0.302           | 0.019-4.803  | 0.758            | 0.323-1.778 |

Table A Continued

|                             |     |       |             |       |             |       |             |       |             |       |             |
|-----------------------------|-----|-------|-------------|-------|-------------|-------|-------------|-------|-------------|-------|-------------|
| <b>Younger females (68)</b> | 0   | 1.141 | 0.914-1.424 | 1.024 | 0.879-1.194 | 0.956 | 0.808-1.130 | 0.521 | 0.077-3.537 | 1.909 | 0.996-3.659 |
|                             | 1   | 1.114 | 0.915-1.355 | 1.018 | 0.934-1.109 | 0.855 | 0.652-1.123 | 0.855 | 0.265-2.751 | 1.050 | 0.593-1.858 |
|                             | 2   | 0.916 | 0.740-1.134 | 1.149 | 0.981-1.345 | 0.926 | 0.744-1.153 | 0.428 | 0.075-2.441 | 1.045 | 0.599-1.825 |
|                             | 3   | 1.069 | 0.864-1.323 | 1.042 | 0.897-1.211 | 1.008 | 0.847-1.199 | 0.168 | 0.019-1.457 | 1.139 | 0.579-2.240 |
|                             | 4   | 1.149 | 0.928-1.422 | 0.916 | 0.736-1.141 | 1.167 | 0.937-1.455 | 0.323 | 0.066-1.582 | 1.296 | 0.720-2.334 |
|                             | 0-1 | 1.231 | 0.930-1.629 | 1.032 | 0.901-1.183 | 0.894 | 0.700-1.141 | 0.632 | 0.107-3.717 | 1.593 | 0.767-3.308 |
|                             | 0-2 | 1.110 | 0.815-1.511 | 1.098 | 0.924-1.304 | 0.875 | 0.668-1.146 | 0.424 | 0.056-3.220 | 1.485 | 0.677-3.254 |
| <b>Older males (135)</b>    | 0   | 0.982 | 0.844-1.142 | 0.994 | 0.888-1.112 | 1.079 | 0.972-1.199 | 1.092 | 0.970-1.229 | 1.212 | 0.888-1.654 |
|                             | 1   | 1.020 | 0.879-1.183 | 0.952 | 0.823-1.100 | 1.031 | 0.925-1.149 | 0.976 | 0.837-1.137 | 1.094 | 0.727-1.646 |
|                             | 2   | 1.081 | 0.931-1.256 | 1.109 | 0.981-1.254 | 1.041 | 0.933-1.163 | 1.013 | 0.928-1.105 | 1.380 | 0.995-1.913 |
|                             | 3   | 1.056 | 0.907-1.230 | 1.047 | 0.942-1.165 | 1.046 | 0.932-1.173 | 0.891 | 0.629-1.264 | 1.360 | 0.971-1.903 |
|                             | 4   | 0.984 | 0.847-1.144 | 1.105 | 0.994-1.229 | 1.045 | 0.949-1.152 | 0.995 | 0.892-1.110 | 0.908 | 0.604-1.366 |
|                             | 0-1 | 1.001 | 0.841-1.191 | 0.965 | 0.825-1.128 | 1.073 | 0.951-1.210 | 1.064 | 0.919-1.232 | 1.272 | 0.822-1.968 |
|                             | 0-2 | 1.049 | 0.857-1.282 | 1.073 | 0.914-1.260 | 1.083 | 0.946-1.241 | 1.066 | 0.907-1.251 | 1.590 | 0.972-2.600 |
| <b>Younger males (193)</b>  | 0   | 0.969 | 0.858-1.094 | 1.046 | 0.961-1.139 | 0.973 | 0.886-1.069 | 1.082 | 0.974-1.202 | 1.129 | 0.841-1.514 |
|                             | 1   | 0.982 | 0.865-1.114 | 1.078 | 0.996-1.166 | 1.004 | 0.929-1.085 | 1.006 | 0.844-1.200 | 0.986 | 0.648-1.500 |
|                             | 2   | 0.910 | 0.796-1.039 | 0.999 | 0.913-1.093 | 0.985 | 0.904-1.074 | 1.003 | 0.912-1.104 | 0.884 | 0.595-1.314 |
|                             | 3   | 1.079 | 0.958-1.215 | 1.017 | 0.947-1.092 | 1.026 | 0.958-1.098 | 1.084 | 0.948-1.239 | 1.116 | 0.821-1.517 |
|                             | 4   | 1.097 | 0.978-1.230 | 1.045 | 0.938-1.163 | 1.070 | 0.972-1.177 | 1.016 | 0.944-1.094 | 0.952 | 0.640-1.417 |
|                             | 0-1 | 0.963 | 0.827-1.121 | 1.088 | 0.989-1.197 | 0.989 | 0.901-1.085 | 1.112 | 0.942-1.312 | 1.123 | 0.734-1.718 |
|                             | 0-2 | 0.915 | 0.768-1.091 | 1.084 | 0.965-1.219 | 0.984 | 0.888-1.091 | 1.113 | 0.907-1.365 | 1.041 | 0.610-1.778 |
| <b>Winter (236)</b>         | 0   | 1.059 | 0.968-1.157 | 1.060 | 0.994-1.131 | 0.973 | 0.898-1.053 | 1.103 | 0.980-1.240 | 1.237 | 1.002-1.527 |
|                             | 1   | 1.008 | 0.921-1.104 | 1.055 | 0.994-1.119 | 0.979 | 0.904-1.060 | 0.981 | 0.806-1.195 | 0.962 | 0.732-1.264 |
|                             | 2   | 1.010 | 0.922-1.106 | 1.056 | 0.995-1.120 | 0.984 | 0.905-1.071 | 0.979 | 0.892-1.073 | 1.052 | 0.833-1.327 |
|                             | 3   | 1.094 | 1.003-1.193 | 1.028 | 0.974-1.085 | 0.996 | 0.926-1.070 | 1.000 | 0.923-1.084 | 1.230 | 1.009-1.500 |
|                             | 4   | 1.090 | 1.004-1.184 | 1.084 | 1.002-1.174 | 1.082 | 0.991-1.181 | 0.986 | 0.911-1.066 | 1.006 | 0.777-1.301 |
|                             | 0-1 | 1.049 | 0.941-1.170 | 1.088 | 1.009-1.173 | 0.970 | 0.887-1.060 | 1.098 | 0.951-1.268 | 1.191 | 0.891-1.593 |
|                             | 0-2 | 1.049 | 0.926-1.187 | 1.126 | 1.030-1.231 | 0.968 | 0.877-1.068 | 1.048 | 0.888-1.238 | 1.221 | 0.866-1.723 |
| <b>Summer (217)</b>         | 0   | 0.910 | 0.754-1.098 | 0.873 | 0.748-1.018 | 1.038 | 0.936-1.150 | 1.067 | 0.958-1.189 | 1.038 | 0.654-1.649 |
|                             | 1   | 1.031 | 0.854-1.244 | 0.980 | 0.875-1.098 | 1.014 | 0.925-1.110 | 0.987 | 0.853-1.141 | 1.361 | 0.849-2.182 |
|                             | 2   | 0.873 | 0.711-1.073 | 1.154 | 1.032-1.292 | 1.010 | 0.930-1.098 | 1.144 | 0.927-1.412 | 1.028 | 0.620-1.704 |
|                             | 3   | 0.920 | 0.756-1.120 | 1.043 | 0.950-1.146 | 1.074 | 0.984-1.172 | 1.006 | 0.705-1.436 | 0.951 | 0.538-1.679 |
|                             | 4   | 1.033 | 0.853-1.251 | 0.962 | 0.859-1.078 | 1.024 | 0.940-1.115 | 1.322 | 0.892-1.959 | 0.815 | 0.460-1.442 |
|                             | 0-1 | 0.953 | 0.759-1.196 | 0.906 | 0.773-1.062 | 1.031 | 0.924-1.149 | 1.061 | 0.905-1.244 | 1.265 | 0.730-2.192 |
|                             | 0-2 | 0.883 | 0.673-1.158 | 1.013 | 0.864-1.187 | 1.028 | 0.919-1.151 | 1.114 | 0.911-1.363 | 1.253 | 0.661-2.376 |
