# Supplementary material for: Ambient air pollution and emergency department visits and hospitalisation for cardiac arrest: a population-based case–crossover study in Reykjavik, Iceland
Source: HighWire-hosted journal article supplement (doi:10.1136/bmjopen-2022-066743), 2023-05-01
Supplement: bmjopen-2022-066743supp002_data_supplement.pdf [file bmjopen-2022-066743supp002_data_supplement.pdf]

**Table B** Number of visits (n), odds ratios (OR) and 95% confidence intervals (CI) for the daily emergency hospital visits for cardiac arrest (ICD-10 code: I46) in Reykjavik capital area associated with 10 µg/m<sup>3</sup> increase in NO<sub>2</sub>, PM<sub>10</sub>, PM<sub>2.5</sub>, SO<sub>2</sub> and H<sub>2</sub>S, adjusted for each pollutant, temperature and relative humidity, stratified by gender, and age at lag 0 to lag 4, lag 0-1, lag 0-2, lag 0-3, and lag 0-4.

| Categories/Visits (n) | Lag               | NO <sub>2</sub> |             | PM <sub>10</sub> |             | PM <sub>2.5</sub> |             | SO <sub>2</sub> |             | H <sub>2</sub> S |             |
|-----------------------|-------------------|-----------------|-------------|------------------|-------------|-------------------|-------------|-----------------|-------------|------------------|-------------|
|                       |                   | OR              | 95% CI      | OR               | 95% CI      | OR                | 95% CI      | OR              | 95% CI      | OR               | 95% CI      |
| Females (125)         | 0                 | 1.223           | 1.011-1.481 | 0.982            | 0.857-1.126 | 0.900             | 0.763-1.063 | 0.256           | 0.039-1.665 | 1.270            | 0.797-2.024 |
|                       | 1                 | 1.029           | 0.860-1.231 | 1.006            | 0.928-1.091 | 0.895             | 0.764-1.049 | 0.740           | 0.237-2.316 | 1.036            | 0.688-1.561 |
|                       | 2                 | 1.009           | 0.839-1.212 | 1.193            | 1.059-1.344 | 0.958             | 0.843-1.089 | 0.284           | 0.051-1.582 | 0.902            | 0.531-1.532 |
|                       | 3                 | 1.029           | 0.860-1.232 | 1.040            | 0.959-1.129 | 0.983             | 0.857-1.127 | 0.286           | 0.064-1.287 | 1.156            | 0.759-1.760 |
|                       | 4                 | 1.175           | 0.997-1.384 | 0.927            | 0.806-1.068 | 1.036             | 0.909-1.181 | 0.495           | 0.154-1.591 | 1.006            | 0.639-1.583 |
|                       | 0-1               | 1.214           | 0.948-1.555 | 1.016            | 0.893-1.157 | 0.867             | 0.724-1.038 | 0.404           | 0.076-2.132 | 1.184            | 0.698-2.008 |
|                       | 0-2               | 1.174           | 0.893-1.543 | 1.110            | 0.958-1.287 | 0.889             | 0.740-1.068 | 0.236           | 0.034-1.664 | 1.172            | 0.605-2.273 |
|                       | 0-3               | 1.177           | 0.867-1.597 | 1.162            | 0.982-1.374 | 0.901             | 0.748-1.085 | 0.134           | 0.015-1.166 | 1.350            | 0.665-2.740 |
|                       | 0-4               | 1.278           | 0.939-1.740 | 1.133            | 0.935-1.372 | 0.914             | 0.754-1.108 | 0.118           | 0.012-1.125 | 1.276            | 0.593-2.743 |
|                       | Males (328)       | 0               | 0.935       | 0.841-1.041      | 1.036       | 0.966-1.112       | 1.012       | 0.946-1.083     | 1.093       | 1.009-1.184      | 1.218       |
| 1                     |                   | 0.989           | 0.888-1.101 | 1.067            | 0.993-1.147 | 1.013             | 0.951-1.079 | 0.992           | 0.882-1.116 | 1.094            | 0.805-1.486 |
| 2                     |                   | 0.982           | 0.878-1.098 | 1.058            | 0.992-1.128 | 0.997             | 0.932-1.067 | 1.000           | 0.937-1.067 | 1.242            | 0.962-1.604 |
| 3                     |                   | 1.087           | 0.978-1.208 | 1.028            | 0.966-1.094 | 1.031             | 0.972-1.094 | 0.996           | 0.921-1.077 | 1.238            | 0.988-1.550 |
| 4                     |                   | 1.079           | 0.975-1.194 | 1.070            | 0.988-1.158 | 1.066             | 0.995-1.142 | 1.007           | 0.944-1.073 | 0.895            | 0.666-1.203 |
| 0-1                   |                   | 0.924           | 0.808-1.057 | 1.077            | 0.989-1.174 | 1.015             | 0.943-1.092 | 1.102           | 0.984-1.233 | 1.302            | 0.936-1.810 |
| 0-2                   |                   | 0.902           | 0.771-1.055 | 1.120            | 1.015-1.237 | 1.012             | 0.933-1.099 | 1.088           | 0.958-1.235 | 1.503            | 1.013-2.229 |
| 0-3                   |                   | 0.942           | 0.793-1.120 | 1.139            | 1.020-1.273 | 1.022             | 0.935-1.117 | 1.086           | 0.940-1.255 | 1.628            | 1.078-2.457 |
| 0-4                   |                   | 0.985           | 0.818-1.186 | 1.174            | 1.037-1.328 | 1.047             | 0.949-1.154 | 1.087           | 0.937-1.260 | 1.499            | 0.955-2.351 |
| Older ≥71 (192)       |                   | 0               | 1.035       | 0.901-1.188      | 0.995       | 0.898-1.102       | 1.038       | 0.940-1.147     | 1.089       | 0.967-1.226      | 1.096       |
|                       | 1                 | 0.985           | 0.853-1.137 | 1.000            | 0.891-1.122 | 1.001             | 0.910-1.101 | 0.974           | 0.833-1.140 | 1.065            | 0.763-1.485 |
|                       | 2                 | 1.099           | 0.953-1.267 | 1.186            | 1.066-1.320 | 1.034             | 0.942-1.135 | 0.989           | 0.901-1.085 | 1.210            | 0.883-1.659 |
|                       | 3                 | 1.030           | 0.894-1.188 | 1.054            | 0.981-1.134 | 1.032             | 0.931-1.144 | 0.823           | 0.513-1.318 | 1.315            | 0.992-1.744 |
|                       | 4                 | 1.071           | 0.943-1.216 | 1.057            | 0.969-1.152 | 1.024             | 0.938-1.117 | 1.000           | 0.895-1.117 | 0.887            | 0.618-1.272 |
|                       | 0-1               | 0.999           | 0.839-1.190 | 0.997            | 0.872-1.141 | 1.019             | 0.912-1.138 | 1.065           | 0.917-1.236 | 1.154            | 0.776-1.717 |
|                       | 0-2               | 1.055           | 0.862-1.291 | 1.151            | 1.005-1.319 | 1.036             | 0.921-1.164 | 1.045           | 0.891-1.226 | 1.266            | 0.796-2.014 |
|                       | 0-3               | 1.060           | 0.848-1.325 | 1.197            | 1.033-1.386 | 1.038             | 0.910-1.185 | 0.993           | 0.824-1.197 | 1.460            | 0.906-2.354 |
|                       | 0-4               | 1.087           | 0.860-1.374 | 1.243            | 1.056-1.463 | 1.056             | 0.915-1.218 | 0.998           | 0.824-1.208 | 1.371            | 0.808-2.324 |
|                       | Younger <71 (261) | 0               | 0.961       | 0.853-1.083      | 1.037       | 0.958-1.122       | 0.962       | 0.885-1.045     | 1.083       | 0.975-1.204      | 1.242       |
| 1                     |                   | 1.019           | 0.905-1.148 | 1.055            | 0.993-1.122 | 0.989             | 0.916-1.068 | 0.998           | 0.833-1.195 | 1.031            | 0.724-1.469 |
| 2                     |                   | 0.892           | 0.784-1.014 | 1.059            | 0.978-1.147 | 0.965             | 0.889-1.048 | 1.005           | 0.914-1.105 | 1.019            | 0.723-1.438 |
| 3                     |                   | 1.076           | 0.957-1.209 | 1.025            | 0.958-1.097 | 1.020             | 0.956-1.088 | 1.069           | 0.941-1.214 | 1.094            | 0.814-1.470 |
| 4                     |                   | 1.123           | 1.002-1.259 | 0.992            | 0.893-1.101 | 1.083             | 0.991-1.183 | 1.007           | 0.930-1.091 | 0.926            | 0.653-1.312 |
| 0-1                   |                   | 0.973           | 0.837-1.132 | 1.075            | 0.990-1.166 | 0.970             | 0.887-1.060 | 1.108           | 0.941-1.306 | 1.236            | 0.840-1.818 |
| 0-2                   |                   | 0.890           | 0.744-1.065 | 1.117            | 1.007-1.238 | 0.959             | 0.869-1.058 | 1.108           | 0.907-1.353 | 1.286            | 0.799-2.069 |
| 0-3                   |                   | 0.930           | 0.761-1.136 | 1.136            | 1.009-1.279 | 0.975             | 0.881-1.080 | 1.149           | 0.915-1.445 | 1.349            | 0.808-2.253 |
| 0-4                   |                   | 1.162           | 0.720-1.874 | 1.133            | 0.856-1.499 | 0.951             | 0.708-1.277 | 0.047           | 0.002-1.342 | 2.088            | 0.734-5.942 |

Table B Continued

|                      |     |       |             |       |             |       |             |       |              |       |             |
|----------------------|-----|-------|-------------|-------|-------------|-------|-------------|-------|--------------|-------|-------------|
| Older females (57)   | 0   | 1.394 | 1.036-1.876 | 0.926 | 0.750-1.142 | 0.772 | 0.523-1.140 | 0.420 | 0.024-7.404  | 0.847 | 0.418-1.713 |
|                      | 1   | 0.970 | 0.717-1.312 | 1.020 | 0.840-1.238 | 0.927 | 0.767-1.119 | 0.454 | 0.045-4.562  | 1.168 | 0.676-2.019 |
|                      | 2   | 1.228 | 0.926-1.628 | 1.177 | 1.010-1.371 | 0.983 | 0.840-1.151 | 0.150 | 0.005-4.657  | 0.534 | 0.182-1.565 |
|                      | 3   | 1.002 | 0.778-1.291 | 1.039 | 0.945-1.144 | 0.966 | 0.781-1.194 | 0.630 | 0.101-3.918  | 1.074 | 0.633-1.823 |
|                      | 4   | 1.128 | 0.908-1.401 | 0.925 | 0.772-1.108 | 0.935 | 0.761-1.148 | 3.684 | 0.414-32.751 | 0.736 | 0.351-1.545 |
|                      | 0-1 | 1.330 | 0.907-1.950 | 0.967 | 0.753-1.242 | 0.861 | 0.653-1.136 | 0.470 | 0.028-7.870  | 0.994 | 0.472-2.093 |
|                      | 0-2 | 1.435 | 0.941-2.189 | 1.105 | 0.869-1.404 | 0.933 | 0.732-1.189 | 0.195 | 0.006-6.790  | 0.777 | 0.270-2.242 |
|                      | 0-3 | 1.364 | 0.879-2.115 | 1.167 | 0.916-1.486 | 0.931 | 0.726-1.194 | 0.174 | 0.006-5.284  | 0.951 | 0.338-2.669 |
|                      | 0-4 | 1.401 | 0.924-2.124 | 1.116 | 0.847-1.469 | 0.918 | 0.701-1.201 | 0.421 | 0.017-10.137 | 0.727 | 0.217-2.434 |
| Younger females (68) | 0   | 1.131 | 0.873-1.465 | 1.052 | 0.864-1.281 | 0.930 | 0.776-1.113 | 0.184 | 0.017-2.013  | 2.148 | 1.038-4.446 |
|                      | 1   | 1.074 | 0.853-1.350 | 1.013 | 0.926-1.109 | 0.857 | 0.649-1.130 | 0.896 | 0.250-3.212  | 0.958 | 0.509-1.800 |
|                      | 2   | 0.853 | 0.661-1.100 | 1.186 | 0.976-1.440 | 0.901 | 0.714-1.137 | 0.481 | 0.072-3.209  | 1.194 | 0.638-2.232 |
|                      | 3   | 1.062 | 0.815-1.384 | 1.037 | 0.879-1.224 | 0.999 | 0.834-1.197 | 0.097 | 0.007-1.338  | 1.248 | 0.608-2.560 |
|                      | 4   | 1.186 | 0.910-1.546 | 0.880 | 0.693-1.118 | 1.197 | 0.964-1.486 | 0.187 | 0.023-1.544  | 1.137 | 0.603-2.146 |
|                      | 0-1 | 1.149 | 0.828-1.595 | 1.044 | 0.900-1.211 | 0.892 | 0.696-1.142 | 0.363 | 0.045-2.893  | 1.624 | 0.711-3.711 |
|                      | 0-2 | 1.001 | 0.687-1.459 | 1.124 | 0.921-1.371 | 0.866 | 0.653-1.150 | 0.277 | 0.027-2.883  | 1.763 | 0.701-4.434 |
|                      | 0-3 | 1.013 | 0.652-1.573 | 1.167 | 0.910-1.496 | 0.896 | 0.674-1.192 | 0.105 | 0.006-1.872  | 2.165 | 0.764-6.133 |
|                      | 0-4 | 1.162 | 0.720-1.874 | 1.133 | 0.856-1.499 | 0.951 | 0.708-1.277 | 0.047 | 0.002-1.342  | 2.088 | 0.734-5.942 |
| Older males (135)    | 0   | 0.940 | 0.795-1.111 | 1.021 | 0.907-1.150 | 1.079 | 0.969-1.202 | 1.097 | 0.971-1.240  | 1.222 | 0.877-1.703 |
|                      | 1   | 1.000 | 0.846-1.183 | 0.985 | 0.846-1.145 | 1.032 | 0.925-1.151 | 0.996 | 0.851-1.164  | 1.116 | 0.722-1.725 |
|                      | 2   | 1.095 | 0.919-1.305 | 1.167 | 1.001-1.362 | 1.039 | 0.920-1.172 | 0.984 | 0.897-1.079  | 1.483 | 1.019-2.159 |
|                      | 3   | 1.053 | 0.881-1.258 | 1.058 | 0.947-1.182 | 1.059 | 0.940-1.192 | 0.831 | 0.518-1.334  | 1.457 | 1.000-2.121 |
|                      | 4   | 1.006 | 0.850-1.191 | 1.126 | 1.005-1.262 | 1.051 | 0.952-1.161 | 1.003 | 0.895-1.123  | 0.938 | 0.910-1.440 |
|                      | 0-1 | 0.920 | 0.748-1.132 | 1.010 | 0.856-1.191 | 1.067 | 0.943-1.207 | 1.090 | 0.938-1.268  | 1.381 | 0.848-2.248 |
|                      | 0-2 | 0.948 | 0.745-1.208 | 1.138 | 0.959-1.350 | 1.078 | 0.937-1.240 | 1.062 | 0.906-1.245  | 1.738 | 1.000-3.021 |
|                      | 0-3 | 0.966 | 0.739-1.263 | 1.177 | 0.972-1.424 | 1.092 | 0.924-1.289 | 1.020 | 0.846-1.230  | 1.963 | 1.062-3.628 |
|                      | 0-4 | 0.949 | 0.709-1.272 | 1.280 | 1.037-1.579 | 1.125 | 0.942-1.344 | 1.033 | 0.851-1.254  | 1.907 | 0.990-3.673 |
| Younger males (193)  | 0   | 0.941 | 0.818-1.081 | 1.050 | 0.960-1.147 | 0.971 | 0.883-1.067 | 1.093 | 0.981-1.217  | 1.194 | 0.871-1.637 |
|                      | 1   | 0.984 | 0.855-1.134 | 1.097 | 1.009-1.193 | 1.005 | 0.929-1.087 | 1.001 | 0.834-1.203  | 1.076 | 0.694-1.668 |
|                      | 2   | 0.922 | 0.792-1.074 | 1.018 | 0.926-1.118 | 0.976 | 0.894-1.066 | 1.011 | 0.919-1.113  | 0.974 | 0.640-1.484 |
|                      | 3   | 1.111 | 0.970-1.272 | 1.017 | 0.942-1.099 | 1.025 | 0.956-1.098 | 1.082 | 0.945-1.238  | 1.108 | 0.798-1.538 |
|                      | 4   | 1.134 | 0.997-1.291 | 1.017 | 0.905-1.143 | 1.076 | 0.975-1.188 | 1.013 | 0.936-1.096  | 0.850 | 0.559-1.292 |
|                      | 0-1 | 0.932 | 0.781-1.113 | 1.110 | 1.003-1.229 | 0.989 | 0.899-1.087 | 1.123 | 0.948-1.329  | 1.208 | 0.767-1.902 |
|                      | 0-2 | 0.868 | 0.704-1.071 | 1.127 | 0.995-1.276 | 0.979 | 0.882-1.086 | 1.134 | 0.919-1.400  | 1.244 | 0.697-2.222 |
|                      | 0-3 | 0.929 | 0.738-1.169 | 1.125 | 0.979-1.293 | 0.993 | 0.891-1.107 | 1.186 | 0.924-1.522  | 1.318 | 0.716-2.426 |
|                      | 0-4 | 1.020 | 0.801-1.300 | 1.123 | 0.961-1.312 | 1.017 | 0.902-1.146 | 1.185 | 0.903-1.556  | 1.173 | 0.596-2.306 |
