# Supplementary material for: Ambient air pollution and emergency department visits and hospitalisation for cardiac arrest: a population-based case–crossover study in Reykjavik, Iceland
Source: HighWire-hosted journal article supplement (doi:10.1136/bmjopen-2022-066743), 2023-05-01
Supplement: bmjopen-2022-066743supp003_data_supplement.pdf [file bmjopen-2022-066743supp003_data_supplement.pdf]

**Table C** Number of visits (n), odds ratios (OR) and 95% confidence intervals (CI) for the daily emergency hospital visits for cardiac arrest (ICD-10 code: I46) in Reykjavik capital area associated with 10 µg/m<sup>3</sup> increase in NO<sub>2</sub>, PM<sub>10</sub>, PM<sub>2.5</sub>, SO<sub>2</sub> and H<sub>2</sub>S, adjusted for each pollutant, temperature and relative humidity, stratified by season, at lag 0 to lag 4, lag 0-1, lag 0-2, lag 0-3, and lag 0-4.

| Categories/Visits (n) | Lag          | NO <sub>2</sub> |             | PM <sub>10</sub> |             | PM <sub>2.5</sub> |             | SO <sub>2</sub> |             | H <sub>2</sub> S |             |
|-----------------------|--------------|-----------------|-------------|------------------|-------------|-------------------|-------------|-----------------|-------------|------------------|-------------|
|                       |              | OR              | 95% CI      | OR               | 95% CI      | OR                | 95% CI      | OR              | 95% CI      | OR               | 95% CI      |
| Winter (236)          | 0            | 1.003           | 0.906-1.111 | 1.064            | 0.992-1.141 | 0.958             | 0.884-1.039 | 1.119           | 0.990-1.265 | 1.224            | 0.980-1.529 |
|                       | 1            | 1.030           | 0.927-1.145 | 1.047            | 0.984-1.115 | 0.982             | 0.905-1.065 | 0.957           | 0.781-1.172 | 0.988            | 0.741-1.319 |
|                       | 2            | 1.021           | 0.919-1.133 | 1.071            | 1.003-1.143 | 0.988             | 0.908-1.076 | 0.972           | 0.886-1.067 | 1.129            | 0.878-1.451 |
|                       | 3            | 1.082           | 0.979-1.195 | 1.038            | 0.980-1.100 | 0.995             | 0.926-1.069 | 0.990           | 0.912-1.074 | 1.207            | 0.976-1.493 |
|                       | 4            | 1.087           | 0.988-1.195 | 1.085            | 0.993-1.187 | 1.089             | 0.995-1.191 | 0.979           | 0.900-1.064 | 0.951            | 0.722-1.252 |
|                       | 0-1          | 1.013           | 0.889-1.154 | 1.089            | 1.003-1.182 | 0.961             | 0.877-1.054 | 1.104           | 0.953-1.279 | 1.200            | 0.876-1.645 |
|                       | 0-2          | 1.016           | 0.873-1.183 | 1.148            | 1.041-1.266 | 0.965             | 0.872-1.068 | 1.037           | 0.874-1.230 | 1.301            | 0.889-1.904 |
|                       | 0-3          | 1.056           | 0.892-1.249 | 1.187            | 1.061-1.328 | 0.965             | 0.866-1.075 | 1.016           | 0.848-1.218 | 1.451            | 0.980-2.149 |
|                       | 0-4          | 1.109           | 0.927-1.326 | 1.240            | 1.089-1.412 | 0.989             | 0.881-1.111 | 0.996           | 0.833-1.191 | 1.362            | 0.882-2.104 |
|                       | Summer (217) | 0               | 0.914       | 0.743-1.126      | 0.864       | 0.736-1.014       | 1.036       | 0.934-1.148     | 1.083       | 0.967-1.214      | 1.043       |
| 1                     |              | 0.993           | 0.814-1.211 | 0.997            | 0.889-1.118 | 1.008             | 0.920-1.105 | 0.984           | 0.852-1.136 | 1.441            | 0.888-2.340 |
| 2                     |              | 0.821           | 0.658-1.023 | 1.175            | 1.046-1.320 | 0.992             | 0.912-1.079 | 1.175           | 0.915-1.509 | 1.009            | 0.583-1.744 |
| 3                     |              | 0.927           | 0.753-1.142 | 1.047            | 0.951-1.152 | 1.073             | 0.982-1.172 | 1.041           | 0.723-1.499 | 0.964            | 0.540-1.720 |
| 4                     |              | 1.036           | 0.841-1.275 | 0.951            | 0.844-1.072 | 1.022             | 0.938-1.114 | 1.373           | 0.863-2.187 | 0.759            | 0.416-1.384 |
| 0-1                   |              | 0.903           | 0.703-1.160 | 0.910            | 0.773-1.071 | 1.027             | 0.920-1.147 | 1.073           | 0.917-1.257 | 1.363            | 0.763-2.435 |
| 0-2                   |              | 0.800           | 0.594-1.076 | 1.033            | 0.878-1.216 | 1.014             | 0.907-1.135 | 1.132           | 0.920-1.393 | 1.360            | 0.684-2.703 |
| 0-3                   |              | 0.764           | 0.546-1.070 | 1.061            | 0.891-1.263 | 1.039             | 0.921-1.172 | 1.176           | 0.902-1.534 | 1.354            | 0.617-2.970 |
| 0-4                   |              | 0.802           | 0.556-1.156 | 1.021            | 0.843-1.236 | 1.056             | 0.924-1.207 | 1.257           | 0.925-1.708 | 1.133            | 0.479-2.679 |
