# Supplementary material for: Ambient air pollution and emergency department visits and hospitalisation for cardiac arrest: a population-based case–crossover study in Reykjavik, Iceland
Source: HighWire-hosted journal article supplement (doi:10.1136/bmjopen-2022-066743), 2023-05-01
Supplement: bmjopen-2022-066743supp004_data_supplement.pdf [file bmjopen-2022-066743supp004_data_supplement.pdf]

**Table D** Number of visits (n), odds ratios (OR) and 95% confidence intervals (CI) for the daily emergency hospital visits for cardiac arrest with successful resuscitation (ICD-10 code: I46.0) and other cardiac arrest categories grouped together (ICD-10 codes I46, I46.1, and I46.9) in Reykjavik capital area associated with 10 µg/m<sup>3</sup> increase in NO<sub>2</sub>, PM<sub>10</sub>, PM<sub>2.5</sub>, SO<sub>2</sub>, and H<sub>2</sub>S, in single pollutant models, at lag 0 to lag 4, lag 0-1, lag 0-2, lag 0-3, and lag 0-4.

| Categories/Visits (n) | Lag                            | NO <sub>2</sub> |             | PM <sub>10</sub> |             | PM <sub>2.5</sub> |             | SO <sub>2</sub> |             | H <sub>2</sub> S |             |
|-----------------------|--------------------------------|-----------------|-------------|------------------|-------------|-------------------|-------------|-----------------|-------------|------------------|-------------|
|                       |                                | OR              | 95% CI      | OR               | 95% CI      | OR                | 95% CI      | OR              | 95% CI      | OR               | 95% CI      |
| <b>I46.0 (194)</b>    | 0                              | 1.037           | 0.913-1.177 | 1.056            | 0.970-1.149 | 0.984             | 0.877-1.104 | 1.374           | 0.762-2.477 | 1.043            | 0.773-1.406 |
|                       | 1                              | 1.043           | 0.923-1.178 | 1.045            | 0.978-1.117 | 0.998             | 0.895-1.114 | 0.865           | 0.534-1.401 | 1.070            | 0.729-1.571 |
|                       | 2                              | 0.995           | 0.874-1.132 | 1.073            | 0.980-1.176 | 1.043             | 0.963-1.129 | 1.053           | 0.878-1.264 | 1.098            | 0.754-1.601 |
|                       | 3                              | 1.085           | 0.967-1.218 | 1.052            | 0.967-1.144 | 1.090             | 1.008-1.178 | 0.999           | 0.914-1.092 | 1.193            | 0.890-1.655 |
|                       | 4                              | 1.108           | 0.978-1.256 | 1.036            | 0.938-1.144 | 1.101             | 1.006-1.204 | 0.570           | 0.222-1.460 | 1.372            | 0.916-2.053 |
|                       | 0-1                            | 1.060           | 0.911-1.234 | 1.076            | 0.983-1.177 | 0.990             | 0.875-1.119 | 1.153           | 0.924-1.439 | 1.087            | 0.711-1.661 |
|                       | 0-2                            | 1.049           | 0.881-1.249 | 1.118            | 0.998-1.252 | 1.023             | 0.909-1.152 | 1.157           | 0.911-1.471 | 1.158            | 0.684-1.960 |
|                       | 0-3                            | 0.102           | 0.911-1.335 | 1.161            | 1.014-1.329 | 1.071             | 0.952-1.204 | 1.110           | 0.866-1.423 | 1.313            | 0.736-2.342 |
|                       | 0-4                            | 1.147           | 0.940-1.401 | 1.177            | 1.013-1.368 | 1.103             | 0.973-1.250 | 1.013           | 0.788-1.302 | 1.504            | 0.801-2.825 |
|                       | <b>I46, I46.1, I46.9 (259)</b> | 0               | 1.023       | 0.921-1.136      | 0.990       | 0.912-1.074       | 0.999       | 0.928-1.075     | 1.061       | 0.971-1.160      | 1.338       |
| 1                     |                                | 0.989           | 0.885-1.104 | 1.025            | 0.945-1.111 | 0.991             | 0.923-1.064 | 1.003           | 0.886-1.135 | 1.029            | 0.768-1.379 |
| 2                     |                                | 0.979           | 0.878-1.092 | 1.079            | 1.008-1.155 | 0.952             | 0.870-1.042 | 0.997           | 0.925-1.075 | 1.025            | 0.793-1.326 |
| 3                     |                                | 1.042           | 0.933-1.164 | 1.023            | 0.967-1.083 | 0.957             | 0.874-1.048 | 1.007           | 0.851-1.191 | 1.196            | 0.954-1.498 |
| 4                     |                                | 1.066           | 0.969-1.172 | 1.037            | 0.957-1.122 | 1.012             | 0.930-1.101 | 1.061           | 0.973-1.156 | 0.813            | 0.595-1.112 |
| 0-1                   |                                | 1.009           | 0.886-1.150 | 1.010            | 0.914-1.116 | 0.993             | 0.915-1.078 | 1.058           | 0.936-1.197 | 1.285            | 0.931-1.773 |
| 0-2                   |                                | 0.995           | 0.858-1.154 | 1.079            | 0.972-1.198 | 0.974             | 0.885-1.072 | 1.047           | 0.910-1.206 | 1.265            | 0.874-1.832 |
| 0-3                   |                                | 1.018           | 0.865-1.199 | 1.089            | 0.975-1.218 | 0.958             | 0.859-1.069 | 1.054           | 0.888-1.251 | 1.350            | 0.931-1.957 |
| 0-4                   |                                | 1.058           | 0.892-1.254 | 1.110            | 0.979-1.259 | 0.962             | 0.853-1.086 | 1.090           | 0.919-1.294 | 1.225            | 0.817-1.836 |
